# Supplementary material
Source: publisher figshare collection journal article supplement (https://karger.figshare.com/ndownloader/files/8717056)
Supplement: Supplementary file 1 [file 8717056]

**Suppl. table 1.** Correlation between the expression of p53 and serine associated enzymes

|  | p53 | | | | p value |
| --- | --- | --- | --- | --- | --- |
| **Negative** | | **Positive** | |
| **N** | **%** | **N** | **%** |
| PHGDH |  |  |  |  |  |
| Negative | 30 | 11.0 | 146 | 53.5 | 0.514 |
| Positive | 20 | 7.3 | 77 | 28.2 |
| PDK1 |  |  |  |  |  |
| Negative | 18 | 6.6 | 62 | 22.7 | 0.302 |
| Positive | 32 | 11.7 | 161 | 59 |
| PDK2 |  |  |  |  |  |
| Negative | 32 | 11.7 | 138 | 50.5 | 0.872 |
| Positive | 18 | 6.6 | 85 | 31.1 |
| PKM2 |  |  |  |  |  |
| Negative | 9 | 3.3 | 67 | 24.5 | 0.115 |
| Positive | 41 | 15 | 156 | 57.1 |
| PSAT |  |  |  |  |  |
| Negative | 35 | 12.8 | 134 | 49.1 | 0.203 |
| Positive | 15 | 5.5 | 89 | 32.6 |

PHGDH phosphoglycerate dehydrogenase; PDK1 pyruvate dehydrogenase kinase 1; PDK2 pyruvate dehydrogenase kinase 2; PKM2 pyruvate kinase M2 isoform; PSAT phosphoserine aminotransferase
